# Supplementary material for: Interactions between corticosterone phenotype, environmental stressor pervasiveness and irruptive movement-related survival
Source: Oxford University Press journal article supplement (doi:10.1242/jeb.187930), 2018-01-01
Supplement: jeb187930supp.pdf [file jeb187930supp.pdf]

**Table S1.** GLMM results evaluating the effects of GC treatment and interactions with release distance from water and time since release on cane toad movement-related survival

**Table S2.** Pairwise comparison results for post-hoc analyses for GC treatment on toad movement-related survival.

**Table S3.** Pairwise comparison results for post-hoc analyses for GC treatment by release distance interval on toad movement-related survival

**Table S4.** Pairwise comparison results for post-hoc analyses for GC treatment by time since release on toad movement-related survival.

**Table S5.** Pairwise comparison results for post-hoc analyses for GC treatment by distance from water by time since release on toad movement-related survival.

[Click here to Download Tables S1 - S5](#)
